# Supplementary material for: Heterogeneity of gut microbial responses in healthy household dogs transitioning from an extruded to a mildly cooked diet
Source: PeerJ journal article supplement (doi:10.7717/peerj.11648), 2021-06-30

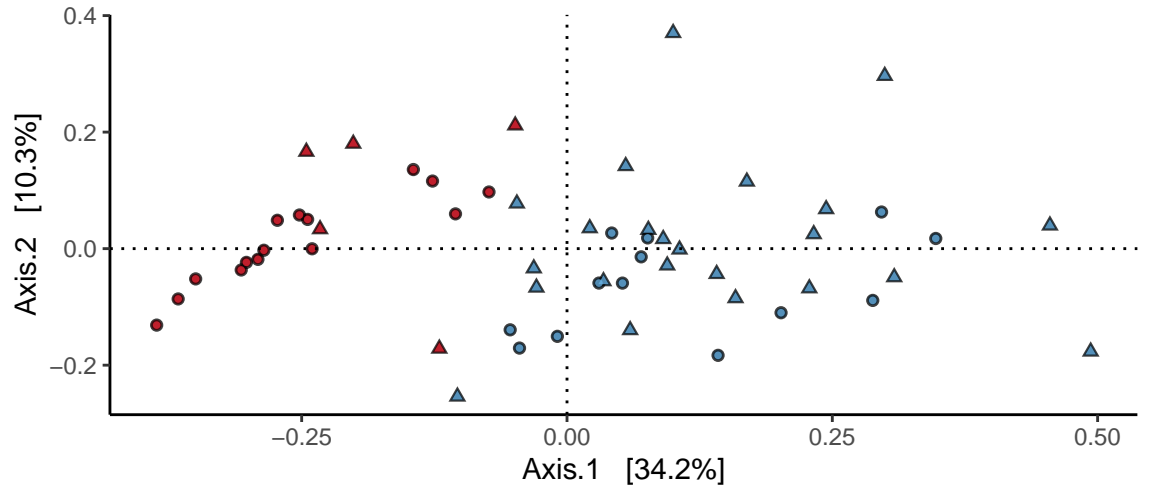

Supplement: Sup_Fig_5.pdf [file Sup_Fig_5.pdf]
