# Supplementary material for: Heterogeneity of gut microbial responses in healthy household dogs transitioning from an extruded to a mildly cooked diet
Source: PeerJ journal article supplement (doi:10.7717/peerj.11648), 2021-06-30
Supplement: Supplemental_Table_1.docx [file Supplemental_Table_1.docx]

**Supplemental Table 1.** List of questions administered on day 28

| **Outcome** | **Question** | **Response choices** |
| --- | --- | --- |
| Overall health | How would you describe your dog's current overall health after switching to Nom Nom? | - Better - About the same - Worse |
| Physical activity | How would you describe your dog's current activity level after switching to Nom Nom? | - More active - About the same - Less active |
| Weight change | What is your dog's current weight (in lbs)? | Weight in lbs  Weight change is then calculated by subtracting weight on day 0 from weight on day 28 |
| Fecal score change | Which of the following best represents your dog's stool after switching to Nom Nom? | Each response is accompanied by a graphic   - Separate hard lumps, like nuts (score = 1)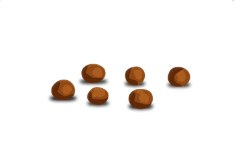 - Sausage-shaped, but lumpy (score = 2)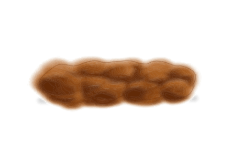 - Sausage-shaped, but with cracks on surface (score = 3) 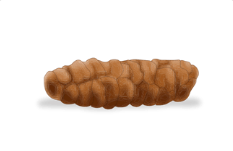 - Sausage or snake-like, smooth and soft (score = 4) 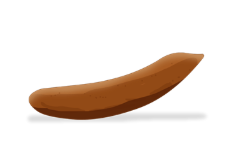 - Soft blobs with clear-cut edges (score = 5) 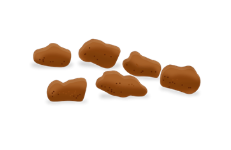 - Fluffy pieces with ragged edges, mushy (score = 6) 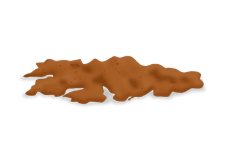 - Watery, no solid pieces (entirely liquid) (score = 7) 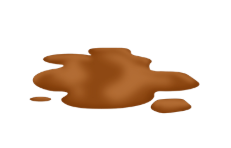   (Fecal score change is then calculated by subtracting fecal score on day 0 from fecal score on day 28) |
| Defecation frequency | Did Nom Nom have any effect on your dog's defecation frequency? | - Defecation became more frequent - Defecation became less frequent - No effect on defecation frequency |
| Flatulence frequency | Did Nom Nom have any effect on your dog's flatulence frequency? | - Flatulence became more frequent - Flatulence became less frequent - No effect on flatulence frequency |
| Coat condition | Did Nom Nom have any effect on your dog's coat condition? | - Coat condition improved - Coat condition worsened - No effect on coat condition |
| Appetite | Did Nom Nom have any effect on your dog's appetite? | - Appetite increased - Appetite decreased - No effect on appetite |
