# Supplementary material for: Heterogeneity of gut microbial responses in healthy household dogs transitioning from an extruded to a mildly cooked diet
Source: PeerJ journal article supplement (doi:10.7717/peerj.11648), 2021-06-30
Supplement: Supplemental_Table_2.docx [file Supplemental_Table_2.docx]

**Supplemental Table 2.** Characteristics of each participant (n=33)

| **Age, years** | **Sex** | **Spayed or neutered** | **Weight, kg** | **Breed** | **Provided health survey data at week 4 (n=31)** | **Provided fecal samples  (n=28)** |
| --- | --- | --- | --- | --- | --- | --- |
| 2.3 | F | YES | 36.3 | Golden Retriever | YES | YES |
| 12.5 | F | YES | 5.3 | Maltese | YES | YES |
| 4.7 | M | NO | 20.9 | Border Collie | YES | YES |
| 9.3 | M | YES | 2.7 | Chihuahua | YES | YES |
| 2.2 | F | YES | 8.6 | Pug | YES | YES |
| 2.3 | M | NO | 5.9 | Chihuahua | YES | NO |
| 1.4 | M | YES | 1.3 | Chihuahua | YES | YES |
| 4.8 | M | YES | 9.1 | Cavalier King Charles Spaniel | YES | YES |
| 3.1 | M | YES | 6.2 | Italian Greyhound | YES | YES |
| 7.5 | M | YES | 2.3 | Yorkie | YES | YES |
| 1.1 | F | YES | 15.9 | Flat-Coated Retriever | YES | YES |
| 4.0 | F | YES | 2.3 | Pomeranian | YES | YES |
| 2.1 | F | YES | 19.1 | Black and Tan Coonhound | YES | YES |
| 1.8 | F | NO DATA | 6.4 | Unknown | YES | NO |
| 8.9 | M | YES | 24.9 | Border Collie Mix | YES | YES |
| 7.9 | F | NO | 6.8 | Chihuahua | YES | YES |
| 5.6 | M | YES | 4.5 | Maltese Yorkie | YES | YES |
| 2.6 | M | NO | 15.9 | Cockapoo | YES | YES |
| 2.4 | F | NO | 21.8 | English Bulldog | YES | YES |
| 12.7 | F | YES | 2.0 | Miniature Pinscher | YES | YES |
| 2.0 | F | YES | 2.8 | Poodle (Toy) | YES | YES |
| 1.0 | M | YES | 11.8 | Pembroke Welsh Corgi | YES | YES |
| 12.0 | F | YES | 4.5 | Shih Tzu | YES | NO |
| 4.7 | F | YES | 12.2 | Basenji Terrier Mix | YES | YES |
| 9.3 | F | YES | 6.4 | Miniature Schnauzer | NO | YES |
| 1.5 | F | YES | 3.6 | Poodle (Miniature) | YES | NO |
| 8.5 | F | YES | 2.9 | Chihuahua | YES | YES |
| 13.2 | M | YES | 6.4 | Maltese Shih Tzu Mix | NO | YES |
| 10.0 | M | NO DATA | 7.3 | Yorkshire Terrier | YES | NO |
| 3.1 | F | YES | 23.1 | Pit Bull Terrier | YES | YES |
| 1.8 | M | YES | 10.4 | French Bulldog | YES | YES |
| 2.0 | M | YES | 5.0 | Pooton | YES | YES |
| 4.5 | M | YES | 13.6 | Puggle | YES | YES |
