# Supplementary material for: Heterogeneity of gut microbial responses in healthy household dogs transitioning from an extruded to a mildly cooked diet
Source: PeerJ journal article supplement (doi:10.7717/peerj.11648), 2021-06-30
Supplement: Supplemental_Table_5.docx [file Supplemental_Table_5.docx]

**Supplemental Table 5.** Nutrient levels derived from guaranteed analysis (mean±SD) of baseline extruded kibble diets in high- (HR), mid- (MR), and low-responders (LR), as well as the intervention diet.

| **Nutrient** | **High- responder**  **(n=5)** | **Mid- responder**  **(n=6)** | **Low- responder**  **(n=4)** | **P-value1** | **Intervention diet2**  **(n=4)** | **P-values3** |
| --- | --- | --- | --- | --- | --- | --- |
| Calorie density,  kcal ME/kg DM | 4,211±186 | 4,241±374 | 4,098±177 | 0.808 | 4,990±357 | 0.001 |
| Moisture,  max % as fed | 10.4±0.9 | 10.7±1.0 | 10.0±0.0 | 0.459 | 73.8±3.0 | <0.001 |
| **%DM** | | | | | | |
| Protein, min | 34.2±6.3 | 32.2±4.1 | 25.2±2.7 | 0.040 | 35.7±2.4 | 0.098 |
| Fat, min | 18.4±2.0 | 17.0±5.1 | 15.7±2.6 | 0.342 | 20.3±4.1 | 0.229 |
| Crude fiber, max | 4.5±0.8 | 3.7±1.0 | 6.2±2.3 | 0.068 | 4.9±2.1 | 0.615 |
| **g/1000 kcal diet** | | | | | | |
| Protein, min | 80.9±11.9 | 75.9±8.8 | 62.0±8.3 | 0.027 | 71.8±7.3 | 0.810 |
| Fat, min | 43.7±3.8 | 39.4±9.6 | 38.2±4.9 | 0.284 | 40.5±5.7 | 0.736 |
| Crude fiber, max | 10.8±2.0 | 8.6±2.5 | 15.1±5.2 | 0.129 | 9.7±4.3 | 0.342 |

DM: dry matter, ME: metabolizable energy

1 Kruskal-Wallis test comparing HR, MR, and LR. For protein (%DM), pairwise Wilcoxon rank sum test with FDR adjustment shows no significant difference among groups. For protein (g/1000kcal), pairwise Wilcoxon rank sum test with FDR adjustment shows HR and MR significantly higher than LR.

2 Mean±SD of the four intervention diet recipes (Beef, Chicken, Pork, Turkey).

3 Wilcoxon rank sum test comparing baseline diets with the four intervention diet recipes.
