# Supplementary material for: Heterogeneity of gut microbial responses in healthy household dogs transitioning from an extruded to a mildly cooked diet
Source: PeerJ journal article supplement (doi:10.7717/peerj.11648), 2021-06-30
Supplement: Supplemental_Table_6.docx [file Supplemental_Table_6.docx]

# **Supplemental Table 6A.** Baselinecharacteristics of high- (HR), mid- (MR), and low-responders (LR). Data are expressed as mean±SD or n (%).

| **Feature** | **HR**  **(n=9)** | **MR**  **(n=9)** | **LR**  **(n=10)** | ***P*-value** |
| --- | --- | --- | --- | --- |
| Age, in years  Male  Spayed or neutered  Body weight, in kg  Ideal body weight, in kg  Body condition scorea  4-5  6  Physical activity levela  Active or very active  Average active  Not or somewhat active  Overall healtha  Excellent  Good  Fair  Food motivationa  Motivated or very motivated  Average motivated  Not at all or mildly motivated  Fecal scorea  Defecation frequencya  ≥ 3 times/day  2 times/day  1 time/day  Flatulence frequencya  Multiple times per day  Daily  Less than daily | 4.7±3.5  4 (44%)  8 (89%)  10.9±7.6  10.6±7.6  8 (89%)  1 (11%)  3 (33%)  3 (33%)  3 (33%)  6 (67%)  2 (22%)  1 (11%)  8 (89%)  0 (0%)  1 (11%)  3.3±1.7  3 (33%)  5 (56%)  1 (11%)  0 (0%)  0 (0%)  9 (100%) | 6.7±3.5  6 (67%)  8 (89%)  9.7±7.7  9.7±7.7  6 (67%)  2 (22%)  4 (50%)  0 (0%)  4 (50%)  6 (75%)  2 (25%)  0 (0%)  7 (78%)  1 (11%)  0 (0%)  3.1±0.8  3 (38%)  5 (63%)  0 (0%)  0 (0%)  1 (11%)  7 (78%) | 4.3±4.1  4 (40%)  8 (80%)  11.5±10.5  11.2±10.5  6 (60%)  4 (40%)  3 (30%)  3 (30%)  4 (40%)  5 (50%)  4 (40%)  1 (10%)  8 (80%)  0 (0%)  2 (20%)  2.5±0.8  2 (20%)  7 (70%)  1 (10%)  1 (10%)  4 (40%)  5 (50%) | 0.156  0.634  0.940  0.993  0.993  0.415  0.486  0.853  0.754  0.405  0.906  0.055 |

a Body condition, overall health, food motivation, fecal score, defecation frequency, and flatulence frequency data were not available in one dog in the MR group.

**Supplemental Table 6B.** Subjectcharacteristics at week 4 of high- (HR), mid- (MR), and low-responders (LR). Data are expressed as mean±SD or n (%).

| **Feature** | **HR**  **(n=9)** | **MR**  **(n=8)** | **LR**  **(n=9)** | ***P*-value** |
| --- | --- | --- | --- | --- |
| Overall health  Better  About the same  Worse  Physical activity  More active  About the same  Less active  Body weight change, in %  Fecal consistency score  Post-intervention  Change from baselinea  Defecation frequency  Higher  No effect  Lower  Flatulence frequency  Higher  No effect  Lower  Coat condition  Better  No effect  Worse  Appetite  Increased  No effect  Decreased | 6 (67%)  3 (33%)  0 (0%)  4 (44%)  5 (56%)  0 (0%)  2.2±6.9  2.4±1.0  -0.9±2.3  0 (0%)  3 (33%)  6 (67%)  0 (0%)  8 (89%)  1 (11%)  4 (44%)  5 (56%)  0 (0%)  5 (56%)  4 (44%)  0 (0%) | 5 (63%)  3 (38%)  0 (0%)  3 (38%)  5 (63%)  0 (0%)  -0.3±3.4  2.6±1.1  -0.6±1.4  0 (0%)  2 (25%)  6 (75%)  0 (0%)  4 (50%)  4 (50%)  3 (38%)  5 (63%)  0 (0%)  5 (63%)  3 (38%)  0 (0%) | 5 (56%)  4 (44%)  0 (0%)  5 (56%)  4 (44%)  0 (0%)  1.1±14.0  2.4±0.7  0.0±0.9  1 (11%)  4 (44%)  4 (44%)  1 (11%)  5 (56%)  3 (33%)  5 (56%)  4 (44%)  0 (0%)  6 (67%)  3 (33%)  0 (0%) | 1  0.885  0.819  0.769  0.535  0.673  0.261  0.885  1 |

a Data not available for 1 subject in the MR group.
