# Supplementary material for: Heterogeneity of gut microbial responses in healthy household dogs transitioning from an extruded to a mildly cooked diet
Source: PeerJ journal article supplement (doi:10.7717/peerj.11648), 2021-06-30
Supplement: Supplemental_Table_7.docx [file Supplemental_Table_7.docx]

**Supplemental Table 7.** Species evenness, richness, and Shannon’s diversity index (mean±SD) in high-, mid-, and low-responders at baseline and week 4.

| **Measure** | **High-responder (n=9)** | **Mid-responder (n=9)** | **Low-responder (n=10)** | **P-value1** |
| --- | --- | --- | --- | --- |
| **Baseline**  Species evenness  Species richness  Shannon diversity index  **Week 4**  Species evenness  Species richness  Shannon diversity index | 0.63±0.09  323±51  2.54±0.37  0.55±0.12  338±83  2.23±0.50 | 0.58±0.17  349±103  2.33±0.68  0.54±0.11  299±87  2.19±0.46 | 0.56±0.10  327±66  2.25±0.39  0.61±0.06  342±64  2.44±0.25 | 0.353  0.957  0.353  0.947  0.757  0.947 |

1 Kruskal-Wallis test comparing high-, mid-, and low-responders.
